# Supplementary material
Source: publisher figshare collection journal article supplement (https://karger.figshare.com/ndownloader/files/38892171)
Supplement: Supplementary file 1 [file 38892171]

| **Type of skin tumor** | **FC** | **Total body** | **Face-neck** | **Upper extremities** | **Ventral thorax** | **Upper back** | **Abdomen** | **Lower back-gluteal** | **Lower extremities** |
| --- | --- | --- | --- | --- | --- | --- | --- | --- | --- |
| **Common** **nevus** | yes | 100 | 54 | 86 | 75 | 88 | 68 | 70 | 96 |
|  | 1-4 |  | 46 | 33 | 49 | 46 | 43 | 47 | 19 |
|  | 5-9 |  | 8 | 30 | 19 | 27 | 16 | 17 | 43 |
|  | 10-19 |  | 0 | 12 | 5 | 7 | 7 | 4 | 22 |
|  | 20-49 |  | 0 | 10 | 2 | 8 | 1 | 2 | 10 |
|  | 50-99 |  | 0 | 1 | 0 | 0 | 1 | 0 | 2 |
| **Dermal nevus** | yes | 63 | 23 | 20 | 22 | 20 | 11 | 11 | 8 |
|  | 1-4 |  | 23 | 19 | 22 | 19 | 9 | 11 | 8 |
|  | 5-9 |  | 0 | 1 | 0 | 1 | 2 | 0 | 0 |
| **Atypical nevus** | yes | 45 | 1 | 4 | 8 | 14 | 9 | 11 | 12 |
|  | 1-4 |  | 1 | 4 | 8 | 11 | 9 | 10 | 12 |
|  | 5-9 |  | 0 | 0 | 0 | 1 | 0 | 1 | 0 |
|  | 10-19 |  | 0 | 0 | 0 | 2 | 0 | 0 | 0 |
| **Congenital nevus** | yes | 12 | 1 | 6 | 0 | 3 | 1 | 2 | 3 |
| 1-4 |  | 1 | 6 | 0 | 3 | 1 | 2 | 3 |
| **Seborrheic keratosis** | yes | 96 | 39 | 36 | 83 | 74 | 62 | 44 | 39 |
| 1-4 |  | 39 | 32 | 32 | 24 | 28 | 25 | 32 |
|  | 5-9 |  | 0 | 2 | 20 | 21 | 17 | 13 | 7 |
|  | 10-19 |  | 0 | 2 | 23 | 14 | 9 | 6 | 0 |
|  | 20-49 |  | 0 | 0 | 7 | 14 | 8 | 0 | 0 |
|  | 50-99 |  | 0 | 0 | 1 | 1 | 0 | 0 | 0 |
| **Hemangioma** | yes | 92 | 34 | 37 | 86 | 57 | 71 | 50 | 32 |
|  | 1-4 |  | 34 | 32 | 52 | 39 | 40 | 40 | 23 |
|  | 5-9 |  | 0 | 5 | 19 | 12 | 19 | 9 | 8 |
|  | 10-19 |  | 0 | 0 | 11 | 6 | 9 | 1 | 0 |
|  | 20-49 |  | 0 | 0 | 3 | 0 | 2 | 0 | 1 |
|  | 50-99 |  | 0 | 0 | 1 | 0 | 1 | 0 | 0 |
| **Dermatofibroma** | yes | 41 | 0 | 6 | 1 | 4 | 2 | 3 | 33 |
|  | 1-4 |  | 0 | 6 | 1 | 4 | 2 | 3 | 31 |
|  | 5-9 |  | 0 | 0 | 0 | 0 | 0 | 0 | 2 |
| **Lentigo** | yes | 98 | 88 | 93 | 64 | 49 | 18 | 12 | 73 |
|  | 1-4 |  | 19 | 10 | 16 | 21 | 12 | 8 | 15 |
|  | 5-9 |  | 34 | 16 | 26 | 14 | 4 | 4 | 23 |
|  | 10-19 |  | 29 | 26 | 20 | 11 | 2 | 0 | 23 |
|  | 20-49 |  | 5 | 35 | 2 | 2 | 0 | 0 | 11 |
|  | 50-99 |  | 1 | 5 | 0 | 1 | 0 | 0 | 1 |
|  | ≥ 100 |  | 0 | 1 | 0 | 0 | 0 | 0 | 0 |

Supplementary Tab. 2: Prevalence and site-specific frequencies of benign skin tumors among the entire cohort (N = 100). Absolute numbers are equivalent to percentages. FC = Frequency Category.
